# Supplementary material for: Paneth cell dysfunction in radiation injury and radio-mitigation by human α-defensin 5
Source: PubMed Central journal article supplement (PMC10448521; doi:10.3389/fimmu.2023.1174140), 2023-08-10
Supplement: Presentation_1.pdf [file Presentation_1.pdf]

## **Supplemental Information**

### **Data Availability Statement**

Microbiota metagenomic sequence data are deposited to NCBI BioProject database (NCBI [BioProject ID PRJNA839408](#))

<https://submit.ncbi.nlm.nih.gov/subs/bioproject/SUB11490178/overview>

Individual values of data presented in different figures in the main article and the supplemental information are deposited to FigShare Data Repository  
DOI: [10.6084/m9.figshare.19758832](https://doi.org/10.6084/m9.figshare.19758832)

| Table S1:                                                         | PCR primer sequences                                                  |
|-------------------------------------------------------------------|-----------------------------------------------------------------------|
| <b>Gene</b>                                                       | <b>5'-3' Sequence</b>                                                 |
| 23S rDNA ( <i>Enterobacteriaceae</i> ) <i>Enl</i><br><i>lsu-1</i> | Forward: TGCCGTA ACTTCGGGAGAAGGCA<br>Reverse: TCAAGGACCAGTG TTCAGTGTC |
| 16S rDNA ( <i>E. coli</i> ) <i>Ecoli</i>                          | Forward: CATGCCGCGTGTATGAAGAA<br>Reverse: CGGGTAACGTCAATGAGCAAA       |
| <i>L. reuteri</i>                                                 | Forward: AGGGTGAAGTCGTAACAAGTAGCC<br>Reverse: CCACCTTCCTCCGGTTTGTC    |
| <i>A. muciniphila</i>                                             | Forward: GAAGACGGAGGACGGAACT<br>Reverse: GCGGATTGCTGACGAAGG           |
| <i>Firmicutes</i>                                                 | Forward: TGAAACTYAAAGGAATTGACG<br>Reverse: ACCATGCACCACCTGTC          |
| <i>Bacteroidetes</i>                                              | Forward: CRAACAGGATTAGATACCCT<br>Reverse: GGTAAGGTTCCCTCGCGTAT        |
| 16S rDNA, (universal)                                             | Forward: ACTCCTACGGGAGGCAGCAGT<br>Reverse: ATTACCGCGGCTGCTGGC         |

| <b>Table S2:</b>               | <b>PCR primer sequences</b>      |
|--------------------------------|----------------------------------|
| <b>Gene</b>                    | <b>5'-3' Sequence</b>            |
| <i>IL-1<math>\beta</math></i>  | Forward: GCAACTGTTCTGAACTCAACT   |
|                                | Reverse: ATCTTTTGGGGTCCGTCAACT   |
| <i>IL-6</i>                    | Forward: TAGTCCTTCCTACCCCAATTCC  |
|                                | Reverse: TTGGTCCTTAGCCACTCCTTC   |
| <i>TNF-<math>\alpha</math></i> | Forward: CCCTCACACTCAGATCATCTTCT |
|                                | Reverse: GCTACGACGTGGGCTACAG     |
| <i>MCP-1/CCL2</i>              | Forward: TTAAAAACCTGGATCGGAACCAA |
|                                | Reverse: GCATTAGCTTCAGATTTACGGGT |
| <i>CXCL1</i>                   | Forward: CTGGGATTACCTCAAGAACATC  |
|                                | Reverse: CAGGGTCAAGGCAAGCCTC     |
| <i>CXCL2</i>                   | Forward: CCAACCACCAGGCTACAGG     |
|                                | Reverse: GCGTCACACTCAAGCTCTG     |
| <i>Defa5</i>                   | Forward: GCTCCTGCTCAACAATTCTCC   |
|                                | Reverse: CAGCTGCAGCAGAATACGAA    |
| <i>Defa6</i>                   | Forward: GACCAGGCTGTGTCTGTCTC    |
|                                | Reverse: CCCTTTCTGCAGGTCCCATT    |
| <i>GAPDH</i>                   | Forward: CTGCACCACCAACTGCTTAG    |
|                                | Reverse: GGGCCATCCACAGTCTTCT     |

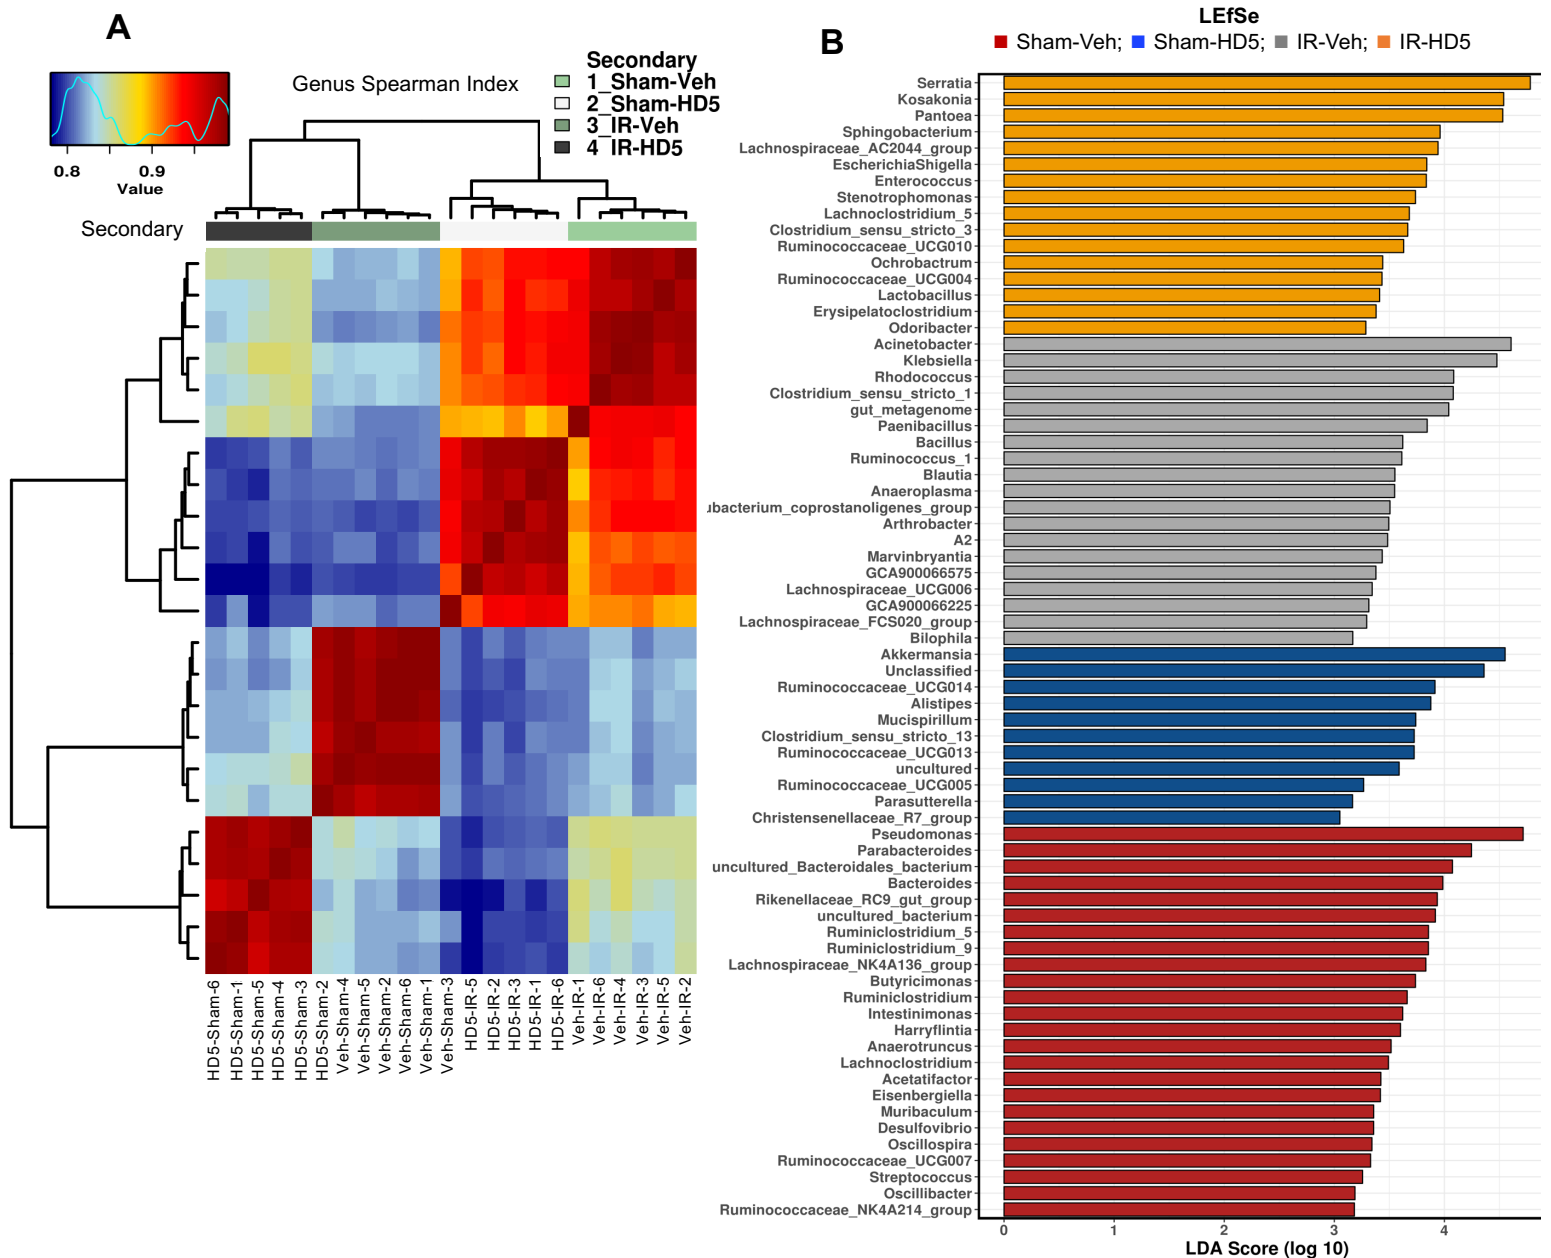

**Figure S1: Prophylactic HD5 treatment attenuates radiation-induced dysbiosis of intestinal microbiota.** Adult mice were fed a liquid diet with vehicle (Veh-Sham & Veh-IR) or HD5 (HD5-Sham & HD5-IR) for 24 hours before sham-treatment (Sham) or irradiated (IR). At 24 hours after irradiation, the microbiota composition in colonic flushing was analyzed by 16S rRNA-sequencing and metagenomics. **A:** Spearman's correlation of microbiota at the genus level in different experimental groups. **B:** Linear discriminate analysis of effect size (LefSe) was used to identify enriched taxa in different groups.

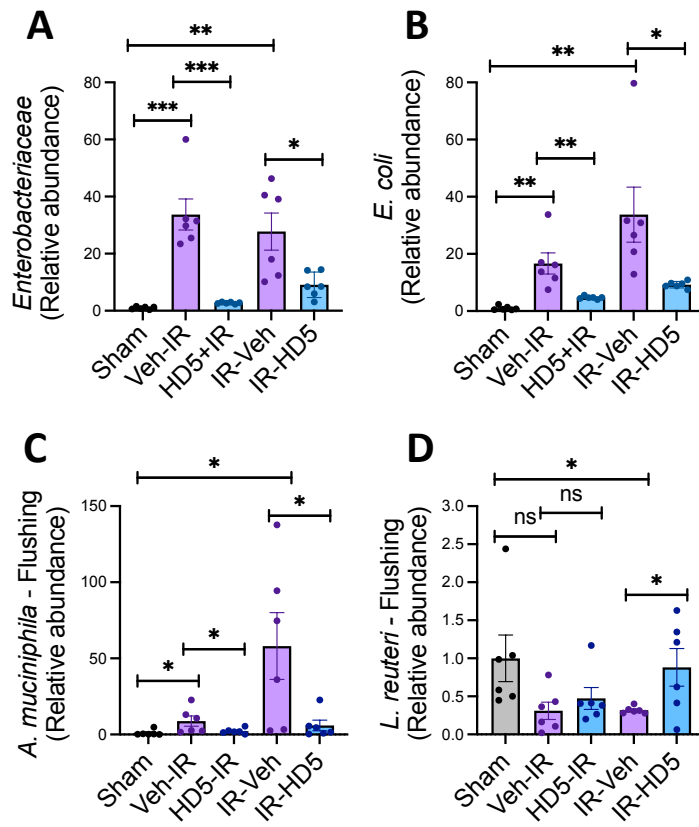

**Figure S2: HD5 prevents and mitigates radiation-induced gut microbiota composition.** Adult mice were subjected to sham treatment (Sham) or irradiation (IR). Some IR groups of mice were fed a liquid diet with vehicle or HD5 (Veh-IR & HD5-IR) for 24 hours before irradiation. Other IR groups of mice were fed a liquid diet with vehicle or HD5 (IR-Veh & IR-HD5) 24 hours after irradiation. DNA preparations from flushing samples were analyzed for the abundance of *Enterobacteriaceae* (A), *E. coli* (B), *A. muciniphila* (C), and *L. reuteri* (D) by RT-qPCR. Values are mean  $\pm$  sem (n = 6); \* =  $p < 0.05$ , \*\* =  $p < 0.01$ , \*\*\* =  $p < 0.001$  for significant difference between the indicated groups.

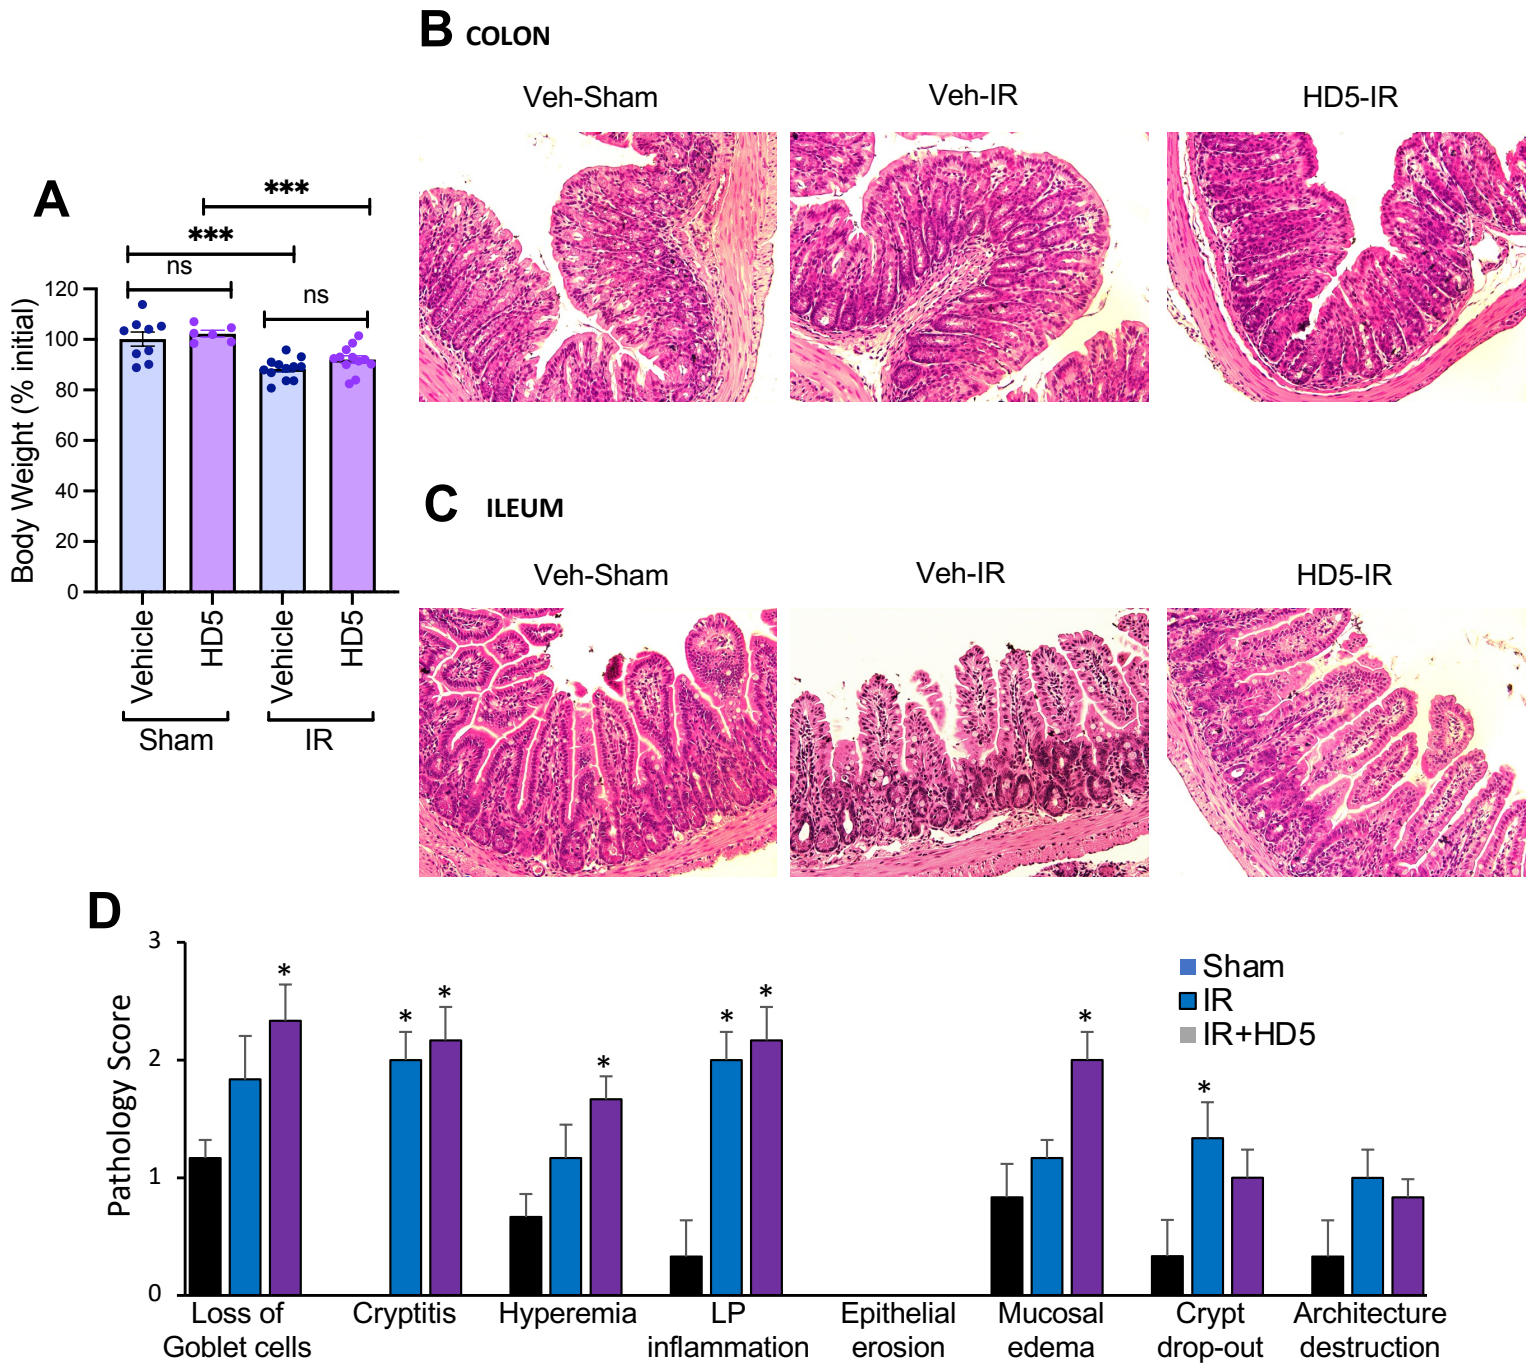

**Figure S3: Effects of radiation and prophylactic HD5 treatment on the intestine.**

Adult mice were subjected to sham treatment (Sham) or irradiation (IR). Some IR group of mice were fed a liquid diet with vehicle or HD5 (Veh-IR & HD5-IR) for 24 hours before irradiation. **A.** Body weight changes. **B & C.** Bright field light microscopic images of H & E-stained sections of colon (B) and ileum (C). **D.** Histopathology scores of H & E-stained sections. Values are mean  $\pm$  sem (n = 6); \* =  $p < 0.05$  for significant difference from corresponding Sham group values.

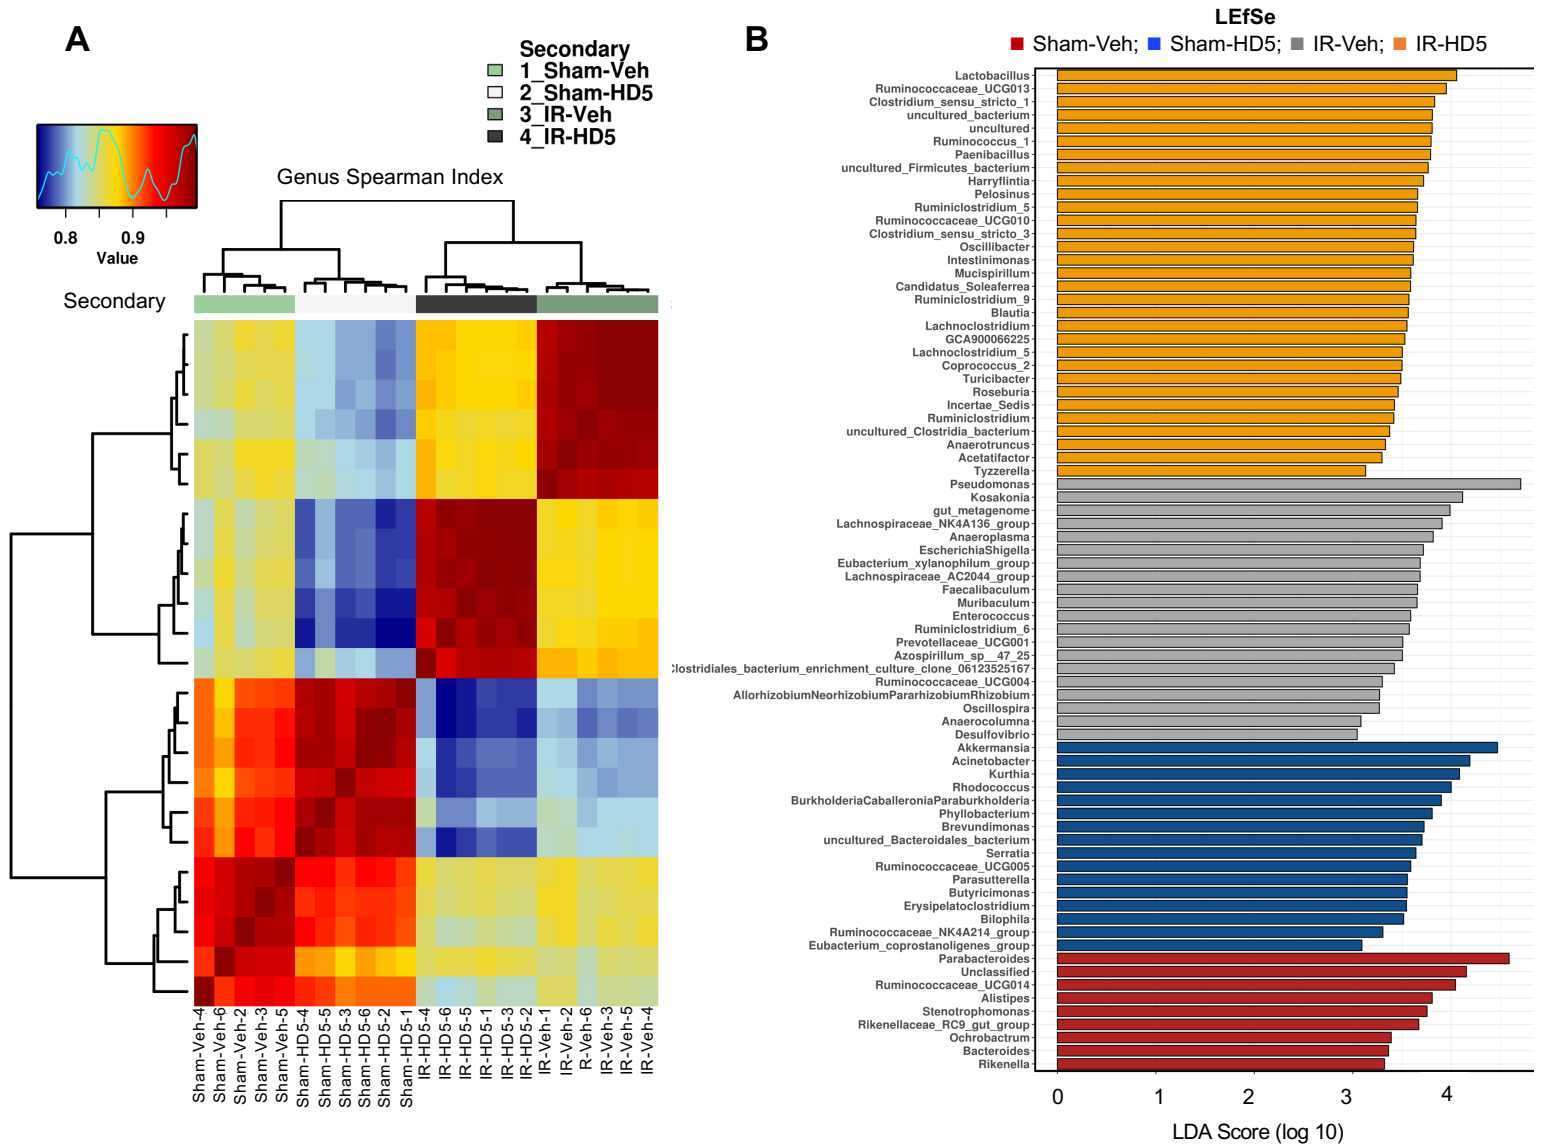

**Figure S4: HD5 at 24 hours after irradiation modulates altered gut microbiota composition.**

At 24 hours after sham-treatment (Sham) or irradiation (IR), mice were fed a liquid diet with vehicle (Sham-Veh & IR-Veh) or HD5 (Sham-HD5 & IR-HD5). After additional 24 hours, the microbiota composition in colonic flushing was analyzed by 16S rRNA-sequencing and metagenomics. **A:** Spearman's correlation of microbiota at the genus level in different experimental groups. **B:** Linear discriminate analysis of effect size (LefSe) was used to identify enriched taxa in different groups.

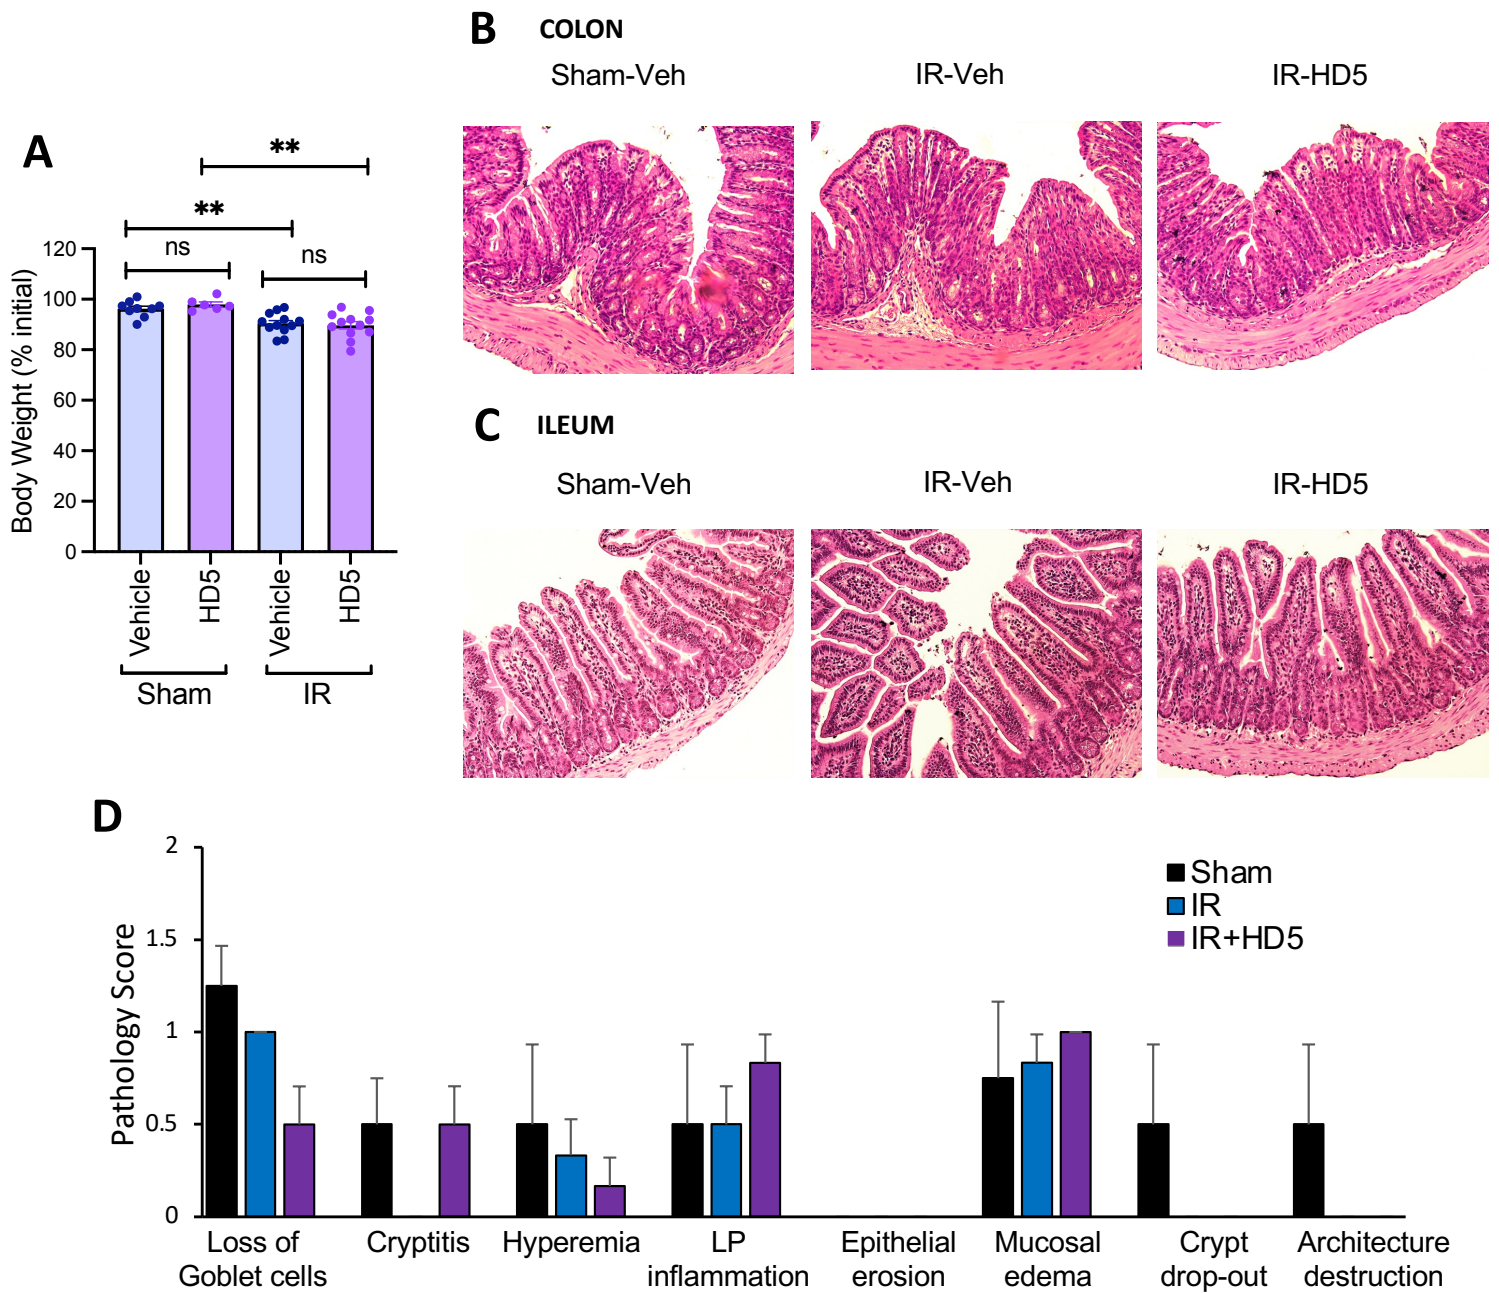

**Figure S5: Effects of radiation and therapeutic HD5 treatment on the intestine.**

Adult mice were subjected to sham treatment (Sham) or irradiation (IR). At 24 hours after irradiation, Sham and IR groups of mice were fed a liquid diet with vehicle or HD5 (Sham-Veh & Sham-HD5; IR-Veh & IR-HD5) for 24 hours. **A.** Body weight changes. **B & C.** Bright field light microscopic images of H & E-stained sections of colon (B) and ileum (C). **D.** Histopathology scores of H & E-stained sections. Values are mean  $\pm$  sem (n = 6).



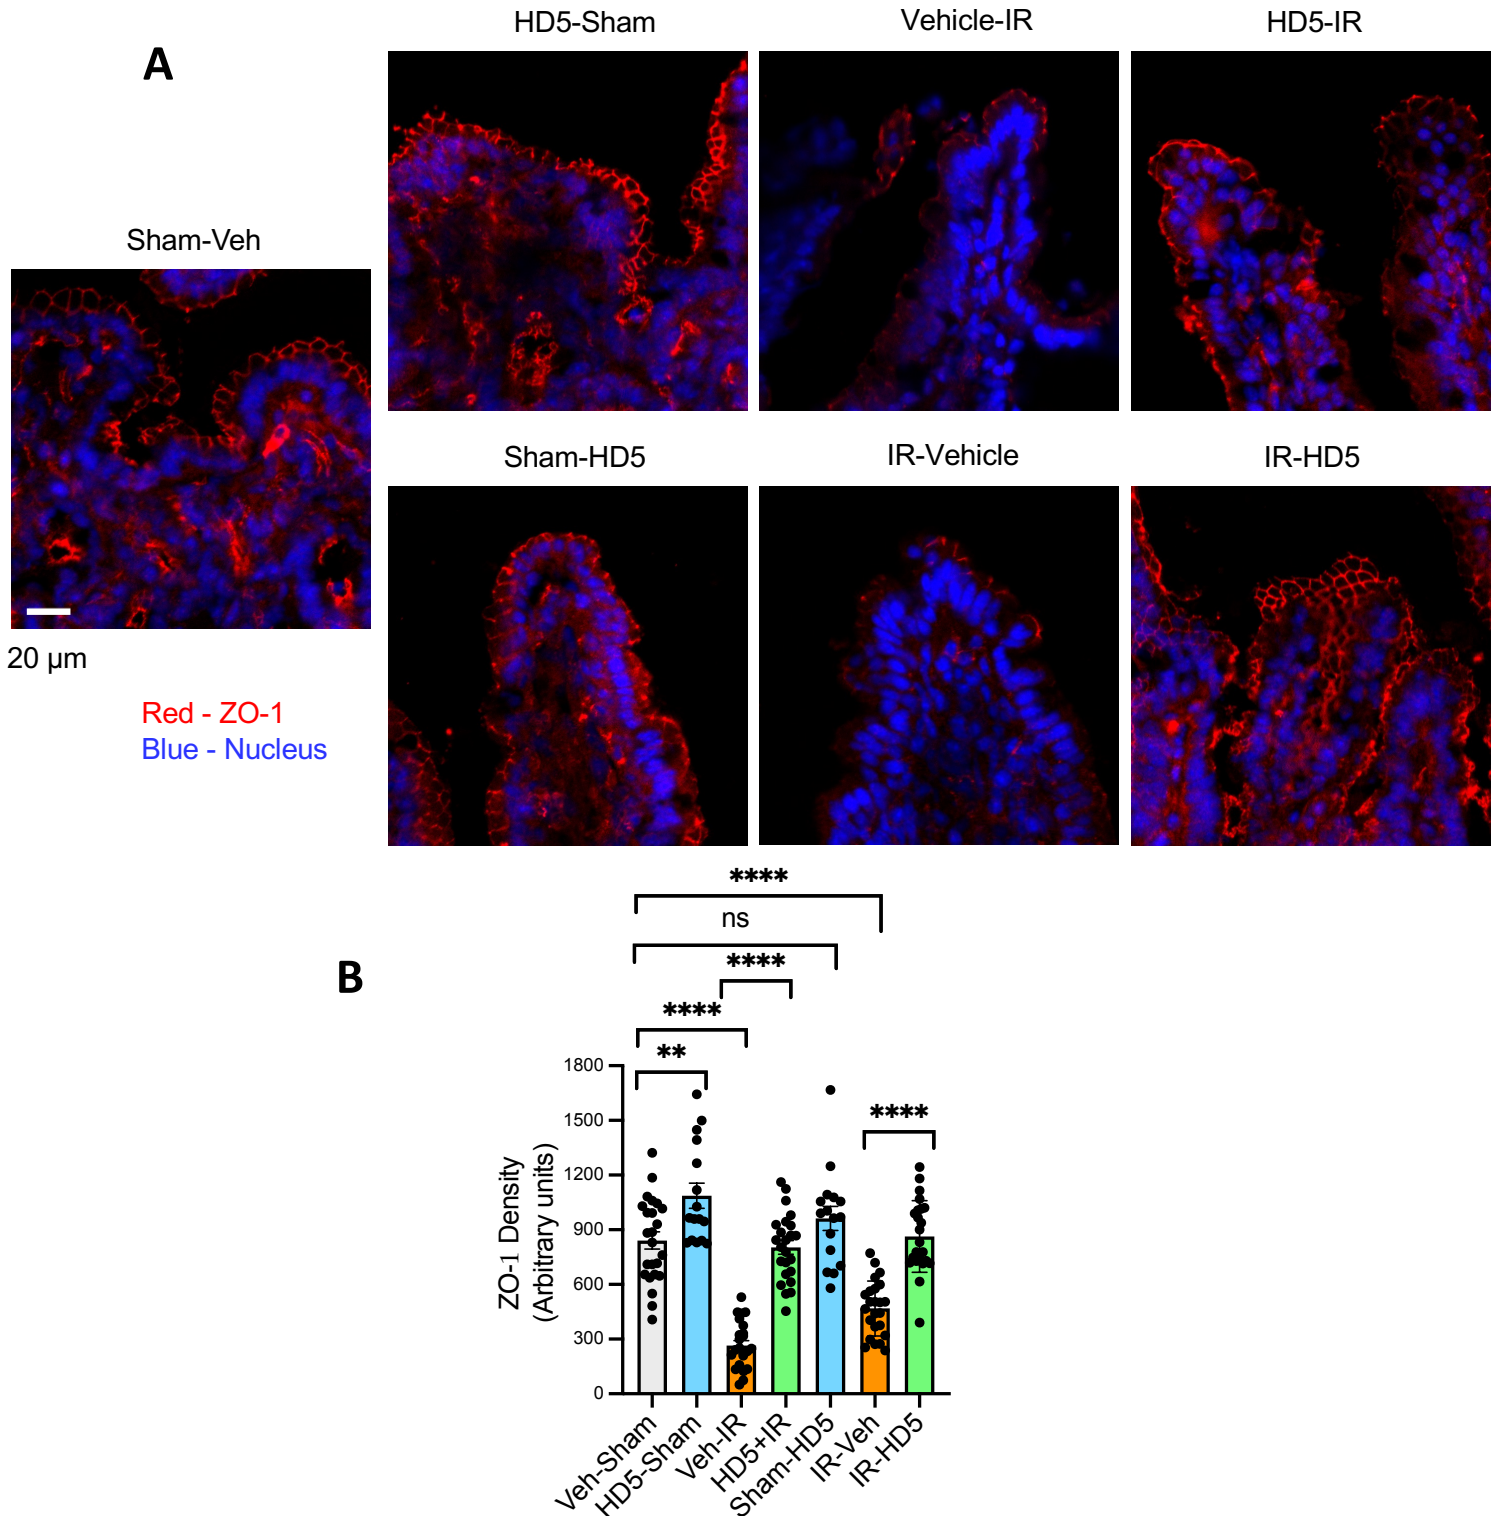

**Figure S6: HD5 treatment reverses radiation-induced epithelial tight junction integrity in the small intestine.**

Adult mice were subjected to sham treatment (Sham) or irradiation (IR). Sham and IR groups of mice were administered Vehicle or HD5 either 24 hours before (HD5-Sham and HD5-IR) or 24 hours after (Sham-HD5 and IR-HD5) irradiation in a liquid diet. At 24 hours after irradiation (HD5-Sham and HD5-IR) or HD5 treatment (Sham-HD5 and IR-HD5) cryosections of ileum were stained for ZO-1 and nucleus. **A.** Representative images of ZO-1 (red) and nucleus (blue). **B.** Densitometric analyses of ZO-1 fluorescence. Values are mean  $\pm$  sem (n = 8 regions each from 3 mice per group).
